# Supplementary material
Source: MDPI journal article supplement (https://www.mdpi.com/2073-445X/11/8/1339)
Supplement: s1 [file s1]

## Survey S1: The development of a multidimensional land use planning in Paraguay

How difficult is to develop a multidimensional land use planning in Paraguay?

|                                    | Very easy | Moderately easy | Neither easy nor difficult | Moderately difficult | Very difficult |
|------------------------------------|-----------|-----------------|----------------------------|----------------------|----------------|
| Multidimensional land use planning |           |                 |                            |                      |                |

Please indicate the main reason of your previous answer

- ☐ Lack of data
- ☐ Lack of expertise to create needed data
- ☐ Lack of resources to create needed data
- ☐ Lack of interest
- ☐ Other: \_\_\_\_\_

Do you think that Paraguay will benefit from having a framework to develop a multidimensional land use planning?

- ☐ Yes
- ☐ No
- ☐ Not sure
- ☐ Does not apply. Paraguay already has a multidimensional framework

Please indicate the main reason of your previous answer

\_\_\_\_\_

In which of the following areas have you been working the most?

- ☐ Environmental topics
- ☐ Social topics
- ☐ Economic topics

### *Environmental criteria*

Based on previous studies in other countries, the list of environmental criteria that can be used to include this dimension in a land use planning is presented below. Please select the level of difficulty to collect the specific criteria considering the context of Paraguay.

| Criteria                             | Very easy | Moderately easy | Neither easy nor difficult | Moderately difficult | Very difficult |
|--------------------------------------|-----------|-----------------|----------------------------|----------------------|----------------|
| Ecosystem services                   |           |                 |                            |                      |                |
| Updated land use and land cover      |           |                 |                            |                      |                |
| Biodiversity                         |           |                 |                            |                      |                |
| Habitat preferences for some species |           |                 |                            |                      |                |
| Environmental policies               |           |                 |                            |                      |                |

Comments (you can add additional data):

---

---

Please rank from highest to lowest those criteria that you consider most important to obtain, with 1 being the most important.

\_\_\_\_\_ Ecosystem services  
\_\_\_\_\_ Updated land use and land cover  
\_\_\_\_\_ Biodiversity  
\_\_\_\_\_ Habitat preferences for some species  
\_\_\_\_\_ Environmental policies

### *Social criteria*

Based on previous studies in other countries, the list of social criteria that can be used to include this dimension in a land use planning is presented below. Please select the level of difficulty to collect the specific criteria considering the context of Paraguay.

| Criteria                 | Very easy | Moderately easy | Neither easy nor difficult | Moderately difficult | Very difficult |
|--------------------------|-----------|-----------------|----------------------------|----------------------|----------------|
| Social impact assessment |           |                 |                            |                      |                |
| Social value             |           |                 |                            |                      |                |
| Land-use preference      |           |                 |                            |                      |                |

Comments (you can add additional data):

---

---

Please rank from highest to lowest those criteria that you consider most important to obtain, with 1 being the most important.

\_\_\_\_\_ Social impact assessment  
\_\_\_\_\_ Social value  
\_\_\_\_\_ Land-use preference

#### *Economic criteria*

Based on previous studies in other countries, the list of economic criteria that can be used to include this dimension in a land use planning is presented below. Please select the level of difficulty to collect the specific criteria considering the context of Paraguay.

| Criteria                     | Very easy | Moderately easy | Neither easy nor difficult | Moderately difficult | Very difficult |
|------------------------------|-----------|-----------------|----------------------------|----------------------|----------------|
| Ecosystem service values     |           |                 |                            |                      |                |
| Cost of conservation actions |           |                 |                            |                      |                |
| Opportunity costs            |           |                 |                            |                      |                |
| Land price markets           |           |                 |                            |                      |                |
| Marginal value               |           |                 |                            |                      |                |
| Economic returns             |           |                 |                            |                      |                |
| Economic policies            |           |                 |                            |                      |                |

Comments (you can add additional data):

---

---

Please rank from highest to lowest those criteria that you consider most important to obtain, with 1 being the most important.

\_\_\_\_\_ Ecosystem service values  
\_\_\_\_\_ Cost of conservation actions  
\_\_\_\_\_ Opportunity costs  
\_\_\_\_\_ Land price markets  
\_\_\_\_\_ Marginal value  
\_\_\_\_\_ Economic returns  
\_\_\_\_\_ Economic policies
